# Supplementary material for: The Effect of Crataegus Fruit Pre-Treatment and Preservation Methods on the Extractability of Aroma Compounds during Liqueur Production
Source: MDPI journal article supplement (doi:10.3390/molecules27051516), 2022-02-23
Supplement: s1 [file s1]

**Table S1.** The least square means of the content of volatile compounds (g·100 g<sup>-1</sup>) with the descriptions of the odors and classification into chemical groups as affected by the sucrose saturation and the preservation method applied to the hawthorn pseudo-fruits during liqueur preparation (Mean ± SE).

| Name of the volatile compounds  |         | Odor descriptor                                            | Saturated with sucrose |                     | Methods of preservation |                             |                     |                     |
|---------------------------------|---------|------------------------------------------------------------|------------------------|---------------------|-------------------------|-----------------------------|---------------------|---------------------|
|                                 |         |                                                            | Yes                    | No                  | Fresh                   | Frozen                      | Freeze-dried        | Hot air-dried       |
| Acetals                         |         |                                                            |                        |                     |                         |                             |                     |                     |
| acetaldehyde diethyl acetal     |         | ethereal, green nut, earthy sweet, vegetable <sup>1*</sup> | 6.320 ± 0.845<br>A     | 10.616 ± 3.288<br>B | 2.773 ± 0.741<br>a      | 12.546 ± 3.751<br>b         | 3.919 ± 0.814<br>a  | 14.635 ± 2.954<br>b |
| isobutyraldehyde diethyl acetal |         |                                                            | 1.500 ± 0.250<br>B     | 0.799 ± 0.188<br>A  | 1.161 ± 0.422<br>ab     | 1.414 ± 0.136<br>b          | 1.191 ± 0.548<br>ab | 0.832 ± 0.257<br>a  |
| 2-methylbutyraldehyde acetal    | diethyl |                                                            | 1.754 ± 0.184<br>A     | 8.208 ± 3.129<br>B  | 1.292 ± 0.278<br>a      | 12.052 ± 5.959 <sup>c</sup> | 3.210 ± 0.605<br>b  | 3.370 ± 0.818<br>b  |
| 3-methylbutyraldehyde acetal    | diethyl |                                                            | 3.935 ± 0.454<br>B     | 2.011 ± 0.396<br>A  | 4.010 ± 0.420<br>c      | 3.108 ± 0.725<br>b          | 2.723 ± 0.242<br>b  | 2.051 ± 0.118<br>a  |
| Alcohols                        |         |                                                            |                        |                     |                         |                             |                     |                     |
| 2-methyl-2-propanol             |         | camphor <sup>1*</sup>                                      | 0.018 ± 0.003<br>A     | 0.029 ± 0.009<br>B  | 0.009 ± 0.000<br>a      | 0.014 ± 0.008<br>a          | 0.036 ± 0.014<br>b  | 0.036 ± 0.007<br>b  |
| 1-butanol                       |         | fusel oil, sweet, balsam, whiskey <sup>1*</sup>            | 0.105 ± 0.056<br>B     | 0.087 ± 0.010<br>A  | 0.210 ± 0.087<br>c      | 0.064 ± 0.038<br>b          | 0.041 ± 0.024<br>a  | 0.069 ± 0.004<br>b  |
| hexanol                         |         | herbal <sup>2*</sup>                                       | 0.060 ± 0.022<br>A     | 0.066 ± 0.016<br>A  | 0.02 ± 0.013<br>a       | 0.081 ± 0.026<br>b          | 0.030 ± 0.006<br>a  | 0.121 ± 0.022<br>c  |
| 2-ethylhexanol                  |         | citrus <sup>2*</sup>                                       | 0.156 ± 0.067<br>B     | 0.110 ± 0.019<br>A  | 0.297 ± 0.087<br>d      | 0.136 ± 0.014<br>c          | 0.016 ± 0.009<br>a  | 0.084 ± 0.029<br>b  |
| benzyl alcohol                  |         | floral <sup>2*</sup>                                       | 0.068 ± 0.016<br>A     | 0.116 ± 0.016<br>B  | 0.129 ± 0.006<br>c      | 0.101 ± 0.029<br>b          | 0.103 ± 0.025<br>b  | 0.035±0.007<br>a    |
| 2-hexyloctanol                  |         | waxy <sup>2*</sup>                                         | 9.614 ± 0.953<br>A     | 8.679 ± 0.649<br>A  | 10.134 ± 1.810<br>a     | 8.884 ± 0.475<br>a          | 9.062 ± 0.666<br>a  | 8.306±1.427<br>a    |
| Aldehydes                       |         |                                                            |                        |                     |                         |                             |                     |                     |
| 3-methylbutanal                 |         | aldehydic <sup>2*</sup>                                    | 0.372 ± 0.095<br>A     | 0.398 ± 0.021<br>B  | 1.031 ± 0.195<br>d      | 0.317 ± 0.113<br>c          | 0.140 ± 0.063<br>b  | 0.052 ± 0.010<br>a  |
| 2-methylbutanal                 |         | chocolate <sup>2*</sup>                                    | 0.263 ± 0.067<br>B     | 0.058 ± 0.004<br>A  | 0.141 ± 0.082<br>b      | 0.220 ± 0.056<br>bc         | 0.256 ± 0.014<br>c  | 0.023 ± 0.002<br>a  |
| benzaldehyde                    |         | fruity, woody, burnt sugar <sup>2,3*</sup>                 | 0.424 ± 0.047<br>A     | 0.729 ± 0.129<br>B  | 0.775 ± 0.259<br>b      | 0.661 ± 0.132<br>b          | 0.452 ± 0.053<br>a  | 0.418 ± 0.038<br>a  |
| 3-(2- or 4-) methylbenzaldehyde |         |                                                            | 0.299 ± 0.035<br>A     | 0.631 ± 0.075<br>B  | 0.633 ± 0.183<br>b      | 0.344 ± 0.079<br>a          | 0.396 ± 0.075<br>a  | 0.488 ± 0.085<br>ab |
| Alkanes                         |         |                                                            |                        |                     |                         |                             |                     |                     |
| 5-propyldecane                  |         |                                                            | 2.667 ± 0.262<br>A     | 2.558 ± 0.190<br>A  | 2.713 ± 0.504<br>a      | 2.789 ± 0.095<br>a          | 2.781 ± 0.117<br>a  | 2.168 ± 0.358<br>a  |

|                                            |                                                                                    |         |        |                    |                    |                     |                    |                     |                     |
|--------------------------------------------|------------------------------------------------------------------------------------|---------|--------|--------------------|--------------------|---------------------|--------------------|---------------------|---------------------|
| 4-methyltetradecane                        |                                                                                    |         |        | 0.720 ± 0.074<br>A | 1.096 ± 0.263<br>B | 0.500 ± 0.018<br>a  | 1.367 ± 0.413<br>c | 0.887 ± 0.046<br>b  | 0.879 ± 0.257<br>b  |
| Alkenes                                    |                                                                                    |         |        |                    |                    |                     |                    |                     |                     |
| 2,4-dimethyl-1-heptene                     |                                                                                    |         |        | 0.551 ± 0.017<br>B | 0.172 ± 0.028<br>A | 0.706 ± 0.031<br>d  | 0.439 ± 0.014<br>c | 0.234 ± 0.016<br>b  | 0.067 ± 0.004<br>a  |
| 2,4-dimethyl-1-decene                      |                                                                                    |         |        | 3.152 ± 0.738<br>B | 2.145 ± 0.344<br>A | 4.257 ± 0.126<br>b  | 2.063 ± 0.556<br>a | 2.158 ± 0.212<br>a  | 2.117 ± 0.574<br>a  |
| 4-methyl-1-undecene                        |                                                                                    |         |        | 1.386 ± 0.243<br>A | 1.139 ± 0.084<br>A | 1.864 ± 0.320<br>b  | 1.163 ± 0.093<br>a | 1.092 ± 0.143<br>a  | 0.928 ± 0.161<br>a  |
| Aromatic hydrocarbons                      |                                                                                    |         |        |                    |                    |                     |                    |                     |                     |
| toluene                                    | pungent, caramel, ethereal, synthetic, fruity, rubbery, solvent-like <sup>3*</sup> |         |        | 0.259 ± 0.050<br>A | 0.356 ± 0.072<br>A | 0.115 ± 0.023<br>a  | 0.356 ± 0.114<br>b | 0.372 ± 0.079<br>b  | 0.389 ± 0.049<br>b  |
| ethylbenzene                               | ethereal, floral, sweet <sup>3*</sup>                                              |         |        | 0.128 ± 0.038<br>A | 0.269 ± 0.074<br>B | 0.041 ± 0.002<br>a  | 0.172 ± 0.012<br>b | 0.423 ± 0.091<br>c  | 0.159 ± 0.063<br>b  |
| <i>p</i> -xylene                           | plastic, cold meat fat-like <sup>3*</sup>                                          |         |        | 0.464 ± 0.090<br>A | 0.793 ± 0.219<br>B | 0.210 ± 0.042<br>a  | 0.563 ± 0.013<br>b | 0.631 ± 0.145<br>b  | 1.111 ± 0.346<br>c  |
| styrene                                    | balsamic <sup>2*</sup>                                                             |         |        | 0.286 ± 0.093<br>A | 2.284 ± 0.110<br>B | 0.073 ± 0.020<br>a  | 3.680 ± 0.209<br>c | 0.647 ± 0.086<br>b  | 0.740 ± 0.139<br>b  |
| <i>o</i> -xylene                           | geranium <sup>1*</sup>                                                             |         |        | 0.198 ± 0.034<br>A | 0.760 ± 0.020<br>B | 0.066 ± 0.007<br>a  | 0.838 ± 0.032<br>c | 0.353 ± 0.089<br>b  | 0.659 ± 0.261<br>c  |
| <i>p</i> - ( <i>o</i> -) cymene            | citrus, solvent <sup>4*</sup>                                                      |         |        | 0.150 ± 0.034<br>A | 0.256 ± 0.016<br>B | 0.086 ± 0.004<br>ab | 0.176 ± 0.025<br>b | 0.496 ± 0.014<br>c  | 0.055 ± 0.013<br>a  |
| Esters-MUFA                                |                                                                                    |         |        |                    |                    |                     |                    |                     |                     |
| butanedioic acid diethyl ester             | mild                                                                               | fruity, | cooked | 0.079 ± 0.015<br>B | 0.030 ± 0.011<br>A | 0.084 ± 0.018<br>b  | 0.012 ± 0.004<br>a | 0.048 ± 0.019<br>ab | 0.074 ± 0.003<br>b  |
| diethyl malonate                           | sweet,                                                                             | fruity, | green  | 0.032 ± 0.007<br>A | 0.042 ± 0.007<br>A | 0.032± 0.002<br>a   | 0.039 ± 0.009<br>a | 0.044 ± 0.010<br>a  | 0.034 ± 0.004<br>a  |
| diethyl methylsuccinate                    |                                                                                    |         |        | 0.078 ± 0.014<br>A | 0.094 ± 0.021<br>A | 0.088 ± 0.015<br>b  | 0.026 ± 0.002<br>a | 0.134 ± 0.014<br>c  | 0.095 ± 0.019<br>b  |
| ethyl-9-hexadecenoate                      |                                                                                    |         |        | 0.217 ± 0.015<br>A | 0.175 ± 0.054<br>A | 0.318 ± 0.041<br>c  | 0.098 ± 0.006<br>a | 0.191 ± 0.005<br>b  | 0.178 ± 0.040<br>b  |
| Esters-PUFA                                |                                                                                    |         |        |                    |                    |                     |                    |                     |                     |
| 9,12,15-octadecatrienoic acid, ethyl ester |                                                                                    |         |        | 5.358 ± 0.894<br>B | 3.383 ± 0.826<br>A | 5.926 ± 0.822<br>b  | 1.973 ± 0.103<br>a | 3.549 ± 0.039<br>a  | 6.036 ± 0.158<br>b  |
| 9,12-octadecadienoic acid, ethyl ester     |                                                                                    |         |        | 3.348 ± 0.503<br>A | 2.330 ± 0.601<br>A | 3.995 ± 0.659<br>c  | 1.499 ± 0.073<br>a | 2.344 ± 0.028<br>ab | 3.518 ± 0.094b<br>c |
| Esters-SAFA                                |                                                                                    |         |        |                    |                    |                     |                    |                     |                     |
| ethyl pentadecanoate                       | honey, sweet <sup>1*</sup>                                                         |         |        | 0.547 ± 0.027<br>A | 0.489 ± 0.055<br>A | 0.585 ± 0.058<br>b  | 0.413 ± 0.061<br>a | 0.538 ± 0.014<br>b  | 0.534 ± 0.014<br>b  |

|                      |                                                                                |                     |                     |                     |                     |                     |                     |
|----------------------|--------------------------------------------------------------------------------|---------------------|---------------------|---------------------|---------------------|---------------------|---------------------|
| ethyl acetate        | ethereal, fruity, sweet,<br>weedy green <sup>1*</sup>                          | 3.182 ± 0.496<br>A  | 3.454 ± 0.485<br>A  | 1.903 ± 0.433<br>a  | 2.706 ± 0.310<br>a  | 4.239 ± 0.513<br>b  | 4.425 ± 0.493<br>b  |
| ethyl butyrate       | fruity juicy, fruit<br>pineapple, cognac <sup>1*</sup>                         | 0.184 ± 0.034<br>A  | 0.828 ± 0.403<br>B  | 0.110 ± 0.015<br>a  | 1.388 ± 0.073<br>b  | 0.322 ± 0.091<br>a  | 0.204 ± 0.044<br>a  |
| ethyl decanoate      | sweet, waxy, fruity,<br>apple, grape oily,<br>brandy <sup>1,2*</sup>           | 1.220 ± 0.128<br>B  | 0.898 ± 0.242<br>A  | 1.008 ± 0.054<br>b  | 0.984 ± 0.052<br>ab | 1.414 ± 0.207<br>c  | 0.920 ± 0.111<br>a  |
| ethyl dodecanoate    | sweet, waxy, soapy and<br>rummy with a creamy,<br>floral nuance <sup>1*</sup>  | 9.192 ± 0.685<br>B  | 6.286 ± 0.129<br>A  | 4.454 ± 0.979<br>a  | 8.091 ± 0.117<br>b  | 10.820 ± 0.601<br>c | 7.591 ± 0.181<br>b  |
| ethyl heptadecanoate |                                                                                | 0.242 ± 0.023<br>B  | 0.150 ± 0.028<br>A  | 0.212 ± 0.007<br>b  | 0.127 ± 0.045<br>a  | 0.229 ± 0.009<br>b  | 0.215 ± 0.068<br>b  |
| ethyl hexadecanoate  | waxy, fruity, creamy<br>and milky with a<br>balsamic nuance <sup>1,3*</sup>    | 35.016 ± 1.096<br>A | 29.774 ± 5.810<br>A | 40.075 ± 5.091<br>b | 20.114 ± 7.705<br>a | 35.875 ± 2.301<br>b | 33.514 ± 2.704<br>b |
| ethyl hexanoate      | sweet, fruity pineapple,<br>waxy, green banana <sup>1*</sup>                   | 0.267 ± 0.066<br>A  | 0.434 ± 0.085<br>B  | 0.183 ± 0.069<br>a  | 0.240 ± 0.012<br>ab | 0.313 ± 0.059<br>b  | 0.667 ± 0.089<br>c  |
| ethyl octanoate      | fruity, wine, waxy,<br>sweet, apricot, banana,<br>brandy, pear <sup>1,2*</sup> | 1.620 ± 0.473<br>A  | 1.984 ± 0.621<br>A  | 2.615 ± 0.961<br>c  | 2.059 ± 0.099<br>b  | 1.796 ± 0.588<br>b  | 0.739 ± 0.084<br>a  |
| ethyl stearate       | mild waxy <sup>1*</sup>                                                        | 0.772 ± 0.139<br>B  | 0.500 ± 0.142<br>A  | 0.811 ± 0.149<br>c  | 0.271 ± 0.016<br>a  | 0.554 ± 0.020<br>b  | 0.909 ± 0.028<br>c  |
| ethyl tetradecanoate | sweet, waxy <sup>1,2*</sup>                                                    | 4.149 ± 0.160<br>B  | 1.384 ± 0.152<br>A  | 2.643 ± 0.064<br>ab | 2.338 ± 0.089<br>a  | 3.283 ± 0.082<br>c  | 2.802 ± 0.085<br>b  |
| ethyl undecanoate    | soapy, waxy, fatty,<br>cognac, coconut <sup>1*</sup>                           | 0.080 ± 0.002<br>B  | 0.057 ± 0.002<br>A  | 0.106 ± 0.003<br>c  | 0.013 ± 0.004<br>a  | 0.092 ± 0.004<br>c  | 0.063 ± 0.003<br>b  |

| Terpenes                         |                                                     |                    |                    |                    |                    |                    |                    |
|----------------------------------|-----------------------------------------------------|--------------------|--------------------|--------------------|--------------------|--------------------|--------------------|
| limonene                         | citrus <sup>2*</sup>                                | 0.146 ± 0.004<br>A | 0.581 ± 0.014<br>B | 0.068 ± 0.001<br>a | 0.440 ± 0.021<br>c | 0.650 ± 0.021<br>d | 0.295 ± 0.009<br>b |
| 3-pinanone                       | cedar camphoreous <sup>1*</sup>                     | 0.110 ± 0.002<br>A | 0.285 ± 0.009<br>B | 0.408 ± 0.016<br>d | 0.043 ± 0.002<br>a | 0.133 ± 0.036<br>b | 0.206 ± 0.016<br>c |
| <i>p</i> -Menth-1-en-4-ol        | Pepper, woody, earth,<br>musty, sweet <sup>1*</sup> | 0.010 ± 0.004<br>A | 0.022 ± 0.011<br>B | 0.001 ± 0.000<br>a | nd                 | 0.051 ± 0.002<br>c | 0.012 ± 0.003<br>b |
| <i>cis-p</i> -Menth-8-en-2-one   | herbal warm <sup>1*</sup>                           | nd                 | 0.116±0.007        | nd                 | nd                 | 0.226 ± 0.013<br>b | 0.005 ± 0.000<br>a |
| <i>trans-p</i> -Menth-8-en-2-one | warm herbal <sup>1*</sup>                           | nd                 | 0.069 ± 0.005      | nd                 | nd                 | 0.139 ± 0.008      | nd                 |
| <i>p</i> -Menth-6,8-dien-2-one   | minty licorice <sup>1*</sup>                        | 0.047 ± 0.002<br>A | 0.392 ± 0.021<br>B | 0.149 ± 0.009<br>b | 0.006 ± 0.000<br>a | 0.694 ± 0.040<br>c | 0.030 ± 0.006<br>a |

|                            |                                                                        | Others             |                    |                    |                    |                    |                    |
|----------------------------|------------------------------------------------------------------------|--------------------|--------------------|--------------------|--------------------|--------------------|--------------------|
| acetic acid                | acidic <sup>2*</sup>                                                   | 1.497 ± 0.273<br>A | 4.859 ± 0.115<br>B | 1.149 ± 0.085<br>a | 4.381 ± 0.214<br>c | 2.099 ± 0.319<br>b | 5.083 ± 0.146<br>d |
| dill ether                 | at 10.00% in dipropylene glycol. dill <sup>1*</sup>                    | 0.033 ± 0.002<br>A | 0.230 ± 0.011<br>B | 0.017 ± 0.002<br>a | 0.039 ± 0.002<br>a | 0.350 ± 0.020<br>b | 0.119 ± 0.075<br>a |
| acetophenone               | almond, flower <sup>4*</sup>                                           | 0.020 ± 0.004<br>A | 0.073 ± 0.003<br>B | 0.018 ± 0.003<br>a | 0.085 ± 0.004<br>c | 0.048 ± 0.017<br>b | 0.035 ± 0.003<br>b |
| 5,6-dihydro-2H-pyran-2-one |                                                                        | 3.082 ± 0.067<br>A | 3.804 ± 0.103<br>A | 2.117 ± 0.105<br>a | 0.819 ± 0.139<br>a | 6.321 ± 0.754<br>c | 4.514 ± 0.750<br>b |
| methyl eugenol             | sweet, fresh, warm<br>spicy, clove carnation<br>cinnamon <sup>1*</sup> | 0.041 ± 0.002<br>A | 0.047 ± 0.002<br>B | 0.066 ± 0.004<br>c | 0.062 ± 0.003<br>c | 0.032 ± 0.002<br>b | 0.016 ± 0.001<br>a |

nd – not detected. Different letters in rows for the given attribute denote statistically significant differences at  $p < 0.05$ . Capital letters denote significance as affected by the sucrose saturation and lowercase letters denote significance as affected by the preservation method. Superscript numbers with an asterisk denote source of the odor description for the respective volatile compound: 1\* - [18]; 2\* - [19]; 3\* - [20]; 4\* - [21].
